# Supplementary material
Source: Research Square preprint supplement (doi:10.21203/rs.3.rs-8873259/v1)
Supplement: Supplementary file 1 [file 5bd6778b46dc923b0003ff81.xlsx]

## Sheet: Foglio1
Gene Name	log2FC IP_AKAP_WT vs IP_EMPTY	padj IP_AKAP_WT vs IP_EMPTY	log2FC IP_AKAP_Δ709-786 vs IP_EMPTY	padj IP_AKAP_Δ709-786 vs IP_EMPTY
NDUFA4	4.06132	7.07433e-46	2.55405	2.94899e-18
SELENOF	3.98077	7.62825e-63	2.80363	6.30824e-31
TXN	3.84314	4.61217e-42	2.29361	3.40335e-15
MGST3	3.80127	8.37084e-51	2.70742	1.25603e-25
TMEM14C	3.66917	8.51628e-59	2.0725	6.68762e-19
SMIM19	3.60234	5.48214e-38	2.06324	1.08004e-12
MAD2L1	3.51804	1.52676e-68	2.31308	1.95343e-29
TM2D1	3.51081	8.82294e-47	2.24715	3.49102e-19
LGALS3	3.50341	8.688e-56	2.31442	2.79987e-24
LINC02154	3.46217	2.80807e-23	2.33196	1.10389e-10
AMN1	3.45312	4.95894e-34	2.20373	7.40342e-14
COX8A	3.40187	3.15729e-35	2.74958	8.69657e-23
ATP6V0E1	3.33902	4.13384e-52	2.64671	2.42194e-32
OIP5	3.29535	1.27803e-42	2.42313	1.00874e-22
ALG14	3.14749	1.81813e-21	2.5576	5.27257e-14
MED31	3.06202	1.12269e-26	2.25882	1.73134e-14
LYSMD2	3.06004	9.39764e-20	2.52486	2.64703e-13
JKAMP	3.04876	3.46411e-57	2.38714	1.28139e-34
SDHD	3.0477	2.44434e-43	2.04177	2.00414e-19
NPC2	3.04526	8.54543e-40	2.13758	1.42503e-19
PCBD1	2.98657	1.27e-45	2.51248	8.60845e-32
CYSTM1	2.96816	8.38903e-36	2.35974	1.97957e-22
CKS1B	2.92258	9.99182e-38	2.14353	3.4341e-20
STRADB	2.8854	7.72872e-51	2.06289	9.56873e-26
C1orf43	2.82841	6.21544e-53	2.19496	1.57074e-31
DAD1	2.7853	8.54606e-39	2.10802	4.32413e-22
TMEM59	2.72003	1.32195e-49	2.0138	6.0941e-27
ETHE1	2.71204	5.84096e-34	2.61697	5.63048e-31
CHPT1	2.65452	1.8485e-64	2.09994	8.95281e-40
LAPTM4B	2.64772	2.51394e-65	2.31272	4.27685e-49
PSENEN	2.63385	1.97494e-27	2.32593	4.78245e-21
GDE1	2.62191	1.39489e-79	2.07162	4.40304e-49
MTX2	2.61177	2.69542e-45	2.21714	3.94063e-32
COX6A1	2.60282	2.62717e-24	2.26219	4.4301e-18
SLC17A5	2.52745	2.77547e-37	2.14195	2.54537e-26
EMC6	2.33822	1.19738e-21	2.39466	4.18739e-22
PRXL2C	2.29264	1.36741e-23	2.06742	7.87009e-19
PTPRR	2.18304	3.29311e-19	2.11457	1.35631e-17
PMP22	2.18234	1.54642e-41	2.19189	4.6327e-41
FHL1	2.12593	3.9912e-25	2.17644	9.88673e-26
LAGE3	2.08745	2.43037e-07	2.12044	2.78903e-07
