# Supplementary material
Source: Research Square preprint supplement (doi:10.21203/rs.3.rs-8873259/v1)
Supplement: Supplementary file 2 [file bc1710c3c4a85d13562db4d1.xlsx]

## Sheet: Foglio1
Gene Name	log2FC IP_AKAP_WT vs IP_EMPTY	padj IP_AKAP_WT vs IP_EMPTY
MT-RNR1	5.16797	1.84874e-29
MT-ND4L	4.80618	4.36383e-101
MTRNR2L8	4.20406	4.03544e-11
C3orf14	4.12291	8.9284e-48
MT-ND3	4.05814	1.76516e-43
MT-ATP8	3.99069	6.00391e-40
RPL39P3	3.97835	3.7055e-21
MTATP6P1	3.90854	9.11213e-49
MT-ND4	3.52743	1.91066e-50
ETFRF1	3.50392	6.98497e-34
GTF2H5	3.46089	2.08083e-43
RPL39	3.4593	5.20971e-36
RPL22L1	3.41351	8.82826e-32
LINC01326	3.40873	1.61896e-27
TMEM126B	3.31936	1.4899e-33
MPC1	3.31401	1.6531e-28
SDHAF3	3.26665	1.13297e-14
RBIS	3.25277	2.54532e-31
GGH	3.25067	2.26267e-50
MTCO3P12	3.22142	5.07806e-14
SNRPG	3.21608	6.25632e-27
RPP40	3.21382	1.67767e-30
NDUFB5	3.21113	5.4383e-41
MTRNR2L12	3.19981	7.23556e-08
MT-RNR2	3.18899	1.90297e-22
MT-ATP6	3.17791	1.32872e-40
LY96	3.16644	1.62907e-22
MSMO1	3.16431	8.09331e-48
MT-CO3	3.14044	5.11977e-09
COX6C	3.13749	5.75314e-31
ESD	3.1356	2.52822e-45
EEF1E1	3.1024	5.85803e-27
COX7C	3.09197	1.9915e-33
RPL34	3.07814	5.80557e-33
RPS7P11	3.07771	3.58758e-12
SEC61G	3.06638	6.79035e-34
MRPL36	3.06217	1.15246e-33
STMP1	3.02483	8.66421e-41
FAM229B	3.00632	3.26035e-23
LYPLA1	2.99832	6.22203e-59
LINC01807	2.98934	7.81353e-19
HSPB11	2.96741	5.4604e-27
MRPS36	2.95255	1.20363e-27
TEX30	2.95186	1.36382e-26
TMEM126A	2.93105	1.6635e-19
AL441992.1	2.91936	1.87605e-26
ITGAE	2.89782	7.92852e-20
GLRX	2.8954	3.92296e-33
SMIM30	2.86075	2.242e-32
RWDD4P2	2.83145	9.60261e-12
LRRC28	2.82321	4.47163e-35
SEC61B	2.81313	1.18893e-28
RPS7	2.81269	2.48864e-32
PDZD11	2.79696	3.13236e-27
FAM210B	2.79112	5.4693e-63
ACOT13	2.78452	1.57196e-24
HIKESHI	2.77751	2.44375e-22
B2M	2.77249	5.48571e-30
MT-ND6	2.77189	8.0002e-16
SNRPGP10	2.76996	2.62659e-17
GNPDA2	2.75851	3.90737e-55
SMIM20	2.74504	2.05791e-23
PCLAF	2.74477	6.53461e-22
HSD17B11	2.74347	4.71717e-28
COX5A	2.74346	3.15729e-35
KDELR3	2.72509	2.4183e-39
APOH	2.71658	1.54131e-21
SETD9	2.71161	2.28742e-26
PI3	2.7076	2.68928e-20
ARL6IP6	2.70153	6.80487e-44
C14orf119	2.69506	6.41948e-29
RPS7P1	2.68952	2.19909e-20
APOO	2.68274	1.50782e-25
COX6B1	2.68232	2.48629e-24
LIPA	2.66476	3.2682e-59
COMMD8	2.66416	4.30156e-27
SUMO2	2.66077	9.47036e-36
RPLP0P6	2.65502	1.23359e-14
OSTC	2.65254	1.02641e-30
VPS29	2.61717	2.92294e-26
MRPS18C	2.60972	4.33029e-19
CFL2	2.60585	4.68751e-38
MIR3681HG	2.60177	1.11365e-22
SDHB	2.5899	1.41904e-30
TP53TG1	2.57815	1.44692e-16
EMC4	2.57794	3.06431e-48
HACD1	2.57035	4.22572e-31
CD47	2.56576	1.44181e-68
VDAC3	2.56479	1.29599e-33
FABP3	2.55157	1.01099e-07
DDIAS	2.54927	3.16484e-32
TMEM45A	2.54916	1.30027e-19
SNRPGP2	2.5383	6.57839e-12
MRPL33	2.52629	5.88213e-21
SEC22A	2.52324	3.66155e-28
MGST1	2.52271	7.9037e-27
PTS	2.51988	9.93745e-20
TPRKB	2.5149	2.34803e-22
CDK1	2.50816	6.23583e-39
TRIQK	2.50801	2.56419e-40
ARMC10	2.50634	2.52976e-28
LEPR	2.5052	5.66883e-69
PPT1	2.49963	1.10958e-59
C8orf88	2.49737	2.40683e-19
PRKRA	2.49361	7.31587e-31
RPL21	2.4904	3.06796e-21
UQCR11	2.48855	7.85173e-20
LINC00973	2.47966	6.4339e-22
TMEM156	2.47964	2.83267e-17
TATDN1	2.47516	3.04783e-22
DERA	2.46357	4.49646e-42
RNF13	2.46128	5.29461e-49
TMBIM4	2.46083	3.95494e-19
ATP5MG	2.45925	5.97017e-19
LRRIQ3	2.45922	1.14968e-17
B3GALNT1	2.45566	8.64058e-32
RPA3	2.44917	5.99192e-19
AC009509.1	2.44103	6.98523e-14
SMIM27	2.44081	7.93324e-10
TFB2M	2.43759	4.16068e-24
LACTB2	2.43655	2.85633e-24
LINC02454	2.43471	1.88087e-16
SNORA74A	2.42677	2.73261e-10
MLLT11	2.4228	1.24794e-41
MRPS6	2.42258	2.46801e-26
ZNHIT3	2.42248	1.65609e-20
LRR1	2.41083	4.15176e-27
COMMD7	2.41038	1.86899e-22
TMEM223	2.4088	1.26285e-21
UBE2E1	2.40747	2.16357e-31
DYNLL1	2.40652	4.49699e-22
POLE2	2.40509	1.09001e-19
LEPROTL1	2.39963	1.24738e-33
AC010327.4	2.39805	3.12996e-15
RFESD	2.39701	5.02588e-12
NDUFC1	2.39666	1.87576e-23
GNG12	2.3951	4.22856e-107
LMBRD1	2.38591	1.848e-31
DUT	2.38476	1.61579e-34
NIT2	2.38083	1.94545e-27
MRPS33	2.38081	3.93258e-20
MRPL39	2.37819	3.67599e-22
IER3IP1	2.37654	2.26459e-26
RAB9A	2.37462	7.66453e-29
DNAJC19	2.37339	5.40789e-22
RWDD4	2.36941	8.01077e-22
RNU5A-8P	2.36281	4.82879e-08
CRIPT	2.35279	3.94027e-20
SNRPE	2.35197	6.77641e-20
TMEM167A	2.3496	2.77445e-35
TRAPPC13	2.34958	2.88516e-41
SLC35A1	2.3481	2.44214e-18
COPS3	2.34731	1.82431e-38
GLRX2	2.3422	9.42096e-25
FPGT	2.334	7.16975e-28
EMP3	2.33018	1.03914e-32
TXNDC9	2.32828	4.76155e-24
TSPAN31	2.32656	3.01976e-30
SLC35A5	2.32551	1.38303e-37
SLC25A5	2.32462	1.79746e-36
POC1B	2.32391	8.2983e-24
BABAM2	2.32321	1.28933e-54
HSPE1	2.3198	5.07035e-13
C4orf3	2.31723	7.71843e-24
RPLP1	2.31693	4.8305e-17
NDUFS3	2.31509	5.31148e-29
NAT1	2.31474	1.61196e-26
HACD3	2.31063	2.25305e-75
ETFA	2.30842	3.4971e-42
LAMP2	2.30482	3.0639e-73
BLOC1S2	2.30388	4.78499e-26
RNFT1	2.29863	1.00274e-14
PRTFDC1	2.29781	1.89489e-26
C4orf33	2.29395	1.81481e-21
AC098487.1	2.29096	2.96812e-12
PIGH	2.29077	2.44498e-22
SLC35B1	2.28944	7.76044e-35
OSGEPL1	2.28903	9.62144e-21
CNRIP1	2.28841	5.26279e-25
CCNC	2.28722	1.49621e-34
RNF170	2.28658	6.21057e-58
MT-ND1	2.28107	9.61892e-27
TMEM255A	2.28047	6.76889e-27
CEBPZOS	2.27598	5.49247e-34
PRDX6	2.27556	4.42853e-27
SVIP	2.2738	7.76955e-30
ORC4	2.27351	4.43878e-33
MANEA	2.26974	4.37256e-40
E2F5	2.26823	1.5584e-23
ALG5	2.26608	1.2639e-28
RPS27L	2.2649	5.11286e-16
ADGRE1	2.25595	3.03124e-38
UNK	2.25253	7.64389e-22
ARV1	2.24866	1.29644e-21
ACOX2	2.24635	3.33897e-32
GNPNAT1	2.24593	1.2347e-49
ATP5F1C	2.24496	3.15949e-26
TMED7	2.24402	4.91468e-50
GLRB	2.24201	5.92864e-30
POMP	2.24055	4.8221e-19
MRPL22	2.23888	4.7115e-16
RHOA	2.23808	1.00453e-52
ATP23	2.23526	4.31289e-11
SSPN	2.23498	8.29678e-21
AC016747.1	2.23202	1.04892e-22
ORMDL2	2.22988	1.0015e-19
HRAT17	2.2293	1.34774e-15
PCOLCE2	2.22807	2.42084e-23
TM2D2	2.22521	2.05893e-36
TMEM106C	2.22332	8.42496e-26
BBIP1	2.22319	2.90861e-20
LYRM4	2.22163	2.2638e-18
CGRRF1	2.22107	4.01333e-24
BET1	2.21984	1.62169e-21
LINC00460	2.21914	4.47244e-19
EXOSC1	2.21883	1.43696e-20
CASP6	2.21706	5.60554e-22
NT5DC1	2.2151	4.19556e-54
RPS23P8	2.21428	4.14026e-08
RPS27A	2.2122	1.89898e-19
TMEM144	2.2096	9.43489e-22
YIPF1	2.20844	2.38174e-35
RPSA	2.20717	8.85937e-28
YWHAQ	2.20659	1.30637e-49
IL24	2.20535	9.35208e-14
LOX	2.20414	2.25013e-32
DPY19L2P1	2.20372	2.44843e-32
RPL9	2.20191	6.35772e-20
SCCPDH	2.20118	7.08819e-33
AIG1	2.19693	5.89141e-25
EEF1A1P5	2.19299	1.83514e-19
DLAT	2.19215	1.20827e-41
ABITRAM	2.19123	1.3517e-22
GINM1	2.18784	3.37866e-33
COX7B	2.18685	8.47874e-16
PRELID3B	2.18661	1.76728e-25
TMEM38B	2.1858	3.43534e-21
MCUB	2.18532	3.32273e-33
SLC25A43	2.18375	7.69806e-30
AC090809.1	2.18229	6.73072e-12
SNAPIN	2.1819	3.38979e-23
MYL12A	2.18091	1.4164e-22
ARL6	2.1804	1.21723e-31
LINC01204	2.17929	6.85904e-23
NME4	2.17393	3.30538e-18
EXTL2	2.17001	1.90206e-44
PON2	2.16856	3.94973e-35
CDKN2AIPNL	2.16759	3.76243e-23
TXNDC12	2.16578	3.18368e-09
RPL15	2.16545	1.27349e-24
AMZ2	2.16507	4.014e-32
LINC00922	2.16498	2.87265e-15
TCAIM	2.16493	1.33449e-34
AMD1	2.16314	4.61487e-59
SLC30A6	2.15992	1.28026e-55
SERPINB7	2.15754	4.88978e-37
GPR89A	2.15659	1.65888e-17
NDRG3	2.15565	4.78515e-51
ABCD3	2.15546	5.23397e-54
TMED10	2.15408	1.96855e-44
TRAM1	2.15363	4.76412e-48
RPS15A	2.15334	1.21305e-17
ST3GAL6	2.15112	7.93257e-10
GOLT1B	2.14976	3.25767e-29
ALG13	2.14889	3.7325e-25
MEST	2.14476	1.35755e-75
RPS3AP6	2.14338	2.64597e-08
MYG1-AS1	2.14336	2.71603e-10
MYCBP	2.13926	6.49432e-22
C1D	2.13756	5.04964e-17
WDR61	2.13685	2.2571e-41
RPLP0	2.13636	4.07038e-26
QRSL1	2.13404	1.2347e-49
CIAO2A	2.13306	1.8754e-18
PDE6D	2.12892	2.45098e-18
ACYP2	2.12751	5.12956e-12
FAM104B	2.12749	7.76381e-15
AP4S1	2.1264	7.03956e-21
EIF3E	2.1257	1.21709e-26
RPS12	2.12462	2.98783e-14
SSBP2	2.12266	1.72319e-27
PTRHD1	2.12101	1.422e-14
LRRC34	2.11839	6.85973e-24
MRPL37	2.11549	2.14117e-30
FASTKD3	2.11459	1.70619e-27
RPS23	2.11349	1.04264e-18
MT-ND2	2.11261	1.28707e-19
GGPS1	2.11175	9.72793e-21
AC078850.1	2.10859	7.42759e-10
DECR1	2.1078	3.67976e-27
MRPL42	2.10757	1.7769e-24
SNHG1	2.1074	1.67604e-17
B4GALT6	2.10586	2.33503e-35
ABHD10	2.10494	1.21096e-28
H3P6	2.10383	1.93029e-16
MINPP1	2.10301	4.22876e-36
IGFL3	2.10024	1.87736e-16
MINDY3	2.09957	5.10627e-30
PECR	2.09772	4.3318e-13
TSLP	2.09517	9.27818e-20
TWSG1	2.09099	1.76919e-67
S100A10	2.09069	6.37362e-18
AP000769.1	2.08989	6.48442e-14
TUBA1B	2.08988	3.94307e-36
SC5D	2.0898	1.13115e-25
RTN3	2.08612	8.50136e-48
ZBED5-AS1	2.086	3.66507e-14
RPS16	2.08293	2.63837e-27
MT-TI	2.08085	2.38502e-09
MARCHF3	2.07952	7.25751e-21
F2RL2	2.07913	6.96771e-24
AL162253.2	2.0771	1.155e-07
NUTF2	2.0741	2.98078e-20
PRCP	2.07174	8.56185e-27
PARPBP	2.06877	7.44353e-33
SHISA4	2.06751	7.25069e-15
GET1	2.06467	1.06153e-19
PPA1	2.06297	3.85604e-31
ITFG1	2.06117	5.08826e-59
AC243919.1	2.05963	2.91891e-09
NDUFB3	2.05939	1.60846e-15
PRDX1	2.05686	2.06651e-25
SLC25A15	2.0562	6.25489e-27
MIF4GD	2.05094	8.59965e-17
DTWD1	2.05044	9.54242e-20
TPT1	2.05036	2.54253e-16
CXCL8	2.04986	2.9337e-17
AK3	2.04937	1.08007e-51
LDHA	2.04595	1.48667e-54
RABIF	2.04527	3.32184e-15
PFN2	2.04523	1.20387e-23
RNF141	2.04375	8.86311e-31
ABRAXAS1	2.04245	3.44233e-27
SRR	2.04178	2.74833e-19
LYPLAL1-AS1	2.03633	6.12168e-08
SSR3	2.03623	5.4958e-37
TMEM251	2.03426	3.94192e-20
PDCD2L	2.03214	5.87424e-14
SLC9A9	2.031	5.26998e-11
UBLCP1	2.02883	4.70647e-26
NEDD1	2.02739	1.22673e-35
TSEN15	2.02679	3.17889e-25
RAB5IF	2.0262	1.22057e-13
QPCT	2.02069	2.31218e-32
NUDT15	2.01934	1.31291e-19
NDUFA6	2.01671	2.00225e-20
PSMA5	2.0137	3.70324e-17
ZNF883	2.01368	1.60688e-23
PMS2P1	2.01327	1.26425e-24
KRT10	2.01181	4.3112e-16
ZDHHC2	2.01104	5.1355e-56
RRM2B	2.01064	2.73234e-48
ENPP4	2.00937	6.89992e-25
VBP1	2.00681	4.31759e-21
CD59	2.00659	1.29646e-45
ACP1	2.00524	3.39561e-20
MTCO2P12	2.00399	1.91626e-05
ALG6	2.00003	1.85261e-16
SLC25A16	2.00002	2.8783e-38
